# Supplementary material
Source: publisher figshare collection journal article supplement (https://gsapubs.figshare.com/ndownloader/files/38883159)
Supplement: Supplementary file 1 [file 38883159]

## Sheet: Sheet1
	Whole Rock Mineralogy
	(Weight %)
Depth	Quartz	K-Feldspar	Plagioclase	Calcite	Dolomite &	Siderite	Pyrite	Marcasite	Total Clay
					Fe-Dolomite
25738.8	45.6	3.8	11.3	0	1.2	0.4	3.4	0	34.3
25742.8	39	4.2	12.8	0	0.3	0	3.2	0	40.4
25747.8	56.3	4.1	18.7	1	0.2	0.2	1.9	0	17.5
25753.7	57.3	4.5	13.5	0.2	1	0	2.6	0	20.9
25763.9	42.2	5	12.7	17.9	0.5	0	1.3	0	20.4
25769.3	33.8	3.7	9.6	0	1.6	0.3	6.7	0	44.2
25781.9	57.4	5.7	15.6	0.2	0.6	0	1.5	0	18.9
25785.9	30	3.5	8.4	0	2.1	0	14.7	0	41.2
25791.9	40.1	3.5	13.3	0	3	0	0.5	0	39.7
25795	54.5	5.7	17.2	0.1	1.6	0	0	0	21
25803.1	46.8	4.2	18.6	0	1.4	0	0.6	0	28.4
25809.4	54.2	6.8	17.5	0	1.2	0	0.4	0	20
25816.8	50.6	7.1	18	0.3	2.1	0	0.5	0	21.3
25826.1	54.3	6	19	1.3	1.5	0	0	0	17.9
25921.1	52.1	4.3	19.7	0.4	3.2	0	0	0	20.3
25926.1	47.5	4	17.1	0.5	3.5	0	0.9	0	26.6
25936.2	52.5	4.6	17.7	0.4	3.7	0	0.4	0	20.7
25945.1	51.4	4.5	16.1	0.9	4.2	0	0.5	0	22.5
25955.2	51	5.8	18.3	2	3.6	0	0	0	19.3
25960.1	52.6	3.8	18.2	0.7	3.5	0	0	0	21.2
26105.5	51.8	3	21.5	0.8	2.3	0	1	0	19.7
26107.6	57.7	4.2	19.5	0.3	0.7	0	0.6	0	17
26109.5	42.4	3.6	17.7	0.9	3.2	0	1.4	0	30.8
26111.5	45.6	3.4	16.1	1.4	2.8	0	1.5	0	29.2
26113.5	34.9	3.8	13.5	0	2.1	0	1.6	0	44
26115.5	56	2.7	17	1.3	3.3	0	1.7	0	18
26117.5	53.7	2.4	20.4	0.5	2.5	0	0.7	0	19.8
26119.5	38	3.2	17.3	0.4	3.7	0	1.4	0	36.1
26121.5	52.9	3.6	19.1	1.9	3.8	0	1.1	0	17.6
26123.5	41.3	4.4	17	0.9	3.6	0	1.2	0	31.5
26125.5	52.9	3.7	19.9	0.7	2.5	0	2.4	0	18
26127.5	47.2	4.2	18.8	1	3.4	0	1.6	0	23.8
26229.8	49.8	4.2	15.2	0	3.2	0	1.7	0	25.8
26328	54.2	4.7	19.5	0.4	1.3	0	0.7	0	19.2
26333	53.4	3.6	22.6	0.3	0.8	0	0.6	0	18.7
26338	55.4	4.3	19.5	0.8	1.4	0	0	0	18.6
26346	50.7	3.5	24.1	0.8	1.4	0	0	0	19.6
26402.1	34	2.5	0	0	0	0	3.8	1.7	58.1
26488.3	55	2.9	18.1	4	0.7	0	0.9	0	18.3
26492.2	44.2	3.7	14.8	0	2.1	0	2.3	0	32.8
26534.3	56.8	4.2	19.7	0.4	0.9	0	1.1	0	17
26540.2	57.5	4.4	20.8	0.5	1.2	0	0.8	0	14.7
26547.4	54.8	3.5	22.4	0.3	1.2	0	0	0	17.9
26554.4	55.1	3.1	20.8	0.2	0.9	0	0.3	0	19.6
26629.5	51.4	2.9	17.7	0.9	0.8	0.6	0.5	0	25.2
26689.5	52.3	4.3	20.4	0.2	0.5	0	0.4	0	21.9
26789.8	57.5	2.9	16.9	0.2	4.3	0	2.2	0	16
26811.6	52.8	3.5	18.5	0	8.3	0	0	0	16.9
26920.8	74.2	3.3	10.3	0.2	1.5	0	1.1	0	9.3
27015	66.8	2.9	10.6	0	1	0	0	0	18.7
27032.3	71.6	3	10.5	0.2	0	0	0	0	14.6
27051.6	57	3.7	12	0	4.9	0.7	2.1	0	19.5
27069.7	72.3	2.8	12.2	0	2.1	0	0	0	10.7
27094.8	47.5	4.2	11	0	2	0	2.5	0	32.7
27178	54.9	3.4	20.7	0.1	1.6	0	0.5	0	18.8
27220.3	37.2	4.1	17.9	0	5	0	0	0	35.9
27223.2	41.6	2.8	14	1.3	26.8	0	1.8	0	11.7
	Clay (Phyllosilicate) Mineralogy
	(Weight %)
Depth	Illite/	Illite &	Kaolinite	Chlorite	%S in	%Barite	%Halite
	Smectite	Mica			I/S *	Removed	Removed
25738.8	5	16.3	1.6	11.4	20-30	0	0
25742.8	6.9	18.8	1.2	13.5	20-30	0	0
25747.8	2	8	0.8	6.7	20-30	0	0
25753.7	2.8	9.1	1.8	7.2	20-30	0.8	0
25763.9	2.9	9.4	1.5	6.6	20-30	0.4	0
25769.3	7.4	21.6	2.3	13	20-30	0.3	0
25781.9	3.9	8.1	1.2	5.8	20-30	1	0
25785.9	6.3	19.2	1.8	13.9	20-30	0	0
25791.9	5.1	14	2	18.6	20-30	0	0
25795	2	8.6	1.7	8.7	20-30	0.7	0
25803.1	2.5	11.2	1.4	13.3	20-30	0.6	0
25809.4	3.8	4.6	1.1	10.5	20-30	0	0
25816.8	3.4	5.7	1	11.1	20-30	0	0
25826.1	2.8	4.4	1.1	9.6	20-30	0	0
25921.1	2.9	4.5	1.5	11.4	20-30	0	0
25926.1	3.9	6.2	1.7	14.8	20-30	0	0
25936.2	3.1	4.6	1.4	11.5	20-30	0	0
25945.1	3.7	5.5	1.9	11.3	20-30	0	0
25955.2	3.8	3.9	1.3	10.4	20-30	0	0
25960.1	3.3	4.7	2.2	11	20-30	0	0
26105.5	3.3	5.2	1.8	9.4	20-30	0	0
26107.6	3.9	4.3	1.2	7.6	20-30	0	0
26109.5	4.5	8.8	2.4	15.1	20-30	0	0
26111.5	5.3	8.2	1.6	14.1	20-30	0	0
26113.5	8.4	13.6	3.8	18.2	20-30	0	0
26115.5	3.6	5.3	0.8	8.3	20-30	0	0
26117.5	3.5	6.1	1.1	9.1	20-30	0	0
26119.5	6.4	9.3	3.2	17.3	20-30	0	0
26121.5	2.9	4.5	1.4	8.9	20-30	0	0
26123.5	6.2	9.8	2	13.5	20-30	0	0
26125.5	3.3	5.3	1.2	8.2	20-30	0	0
26127.5	3.9	6.5	1.7	11.6	20-30	0	0
26229.8	5.2	7.4	1.9	11.3	20-30	0	0
26328	3.4	4.8	1.8	9.2	20-30	0	0
26333	3.3	4.3	1.6	9.5	20-30	0	0.5
26338	3.2	4.8	1.1	9.6	20-30	0	0
26346	3	4.3	1.7	10.5	20-30	0	0
26402.1	32.1	14.4	3	8.6	50-60	0	0
26488.3	4.1	3.6	1.7	8.9	20-30	0	0
26492.2	7.8	6.4	5.4	13.2	20-30	1.8	0
26534.3	3.3	4.4	1.3	8	20-30	0	0
26540.2	3	3.8	1.7	6.3	20-30	0	0
26547.4	3.1	4.3	1.7	8.9	20-30	0	0.1
26554.4	3.4	4.4	1.6	10.3	20-30	0.4	0.3
26629.5	5.2	5.8	1.9	12.3	20-30	0	0.4
26689.5	3.6	4.8	1.2	12.5	20-30	0	0
26789.8	4.8	3.4	1.3	6.6	20-30	0.7	0
26811.6	3.9	4.7	1.6	6.6	20-30	0.4	0
26920.8	2.4	3	1.2	2.7	20-30	0.5	0
27015	4.6	5.3	2.2	6.6	20-30	0	0
27032.3	4.4	3.7	1.7	4.9	20-30	0	0
27051.6	4.5	5.7	2.5	6.7	20-30	0	0
27069.7	2.8	3.4	1.1	3.4	20-30	0	0
27094.8	7.4	9.6	5.5	10.2	20-30	0	0
27178	3.9	3.7	2.1	9.2	20-30	0	0
27220.3	7.2	6.3	9.1	13.2	20-30	0	0
27223.2	3.2	2.6	3.4	2.4	20-30	0	0

## Sheet: G50641
Vimpere, L., et al., 2023, Carbon isotope and biostratigraphic evidence for an expanded Paleocene–Eocene Thermal Maximum sedimentary record in the deep Gulf of Mexico: Geology, https://doi.org/10.1130/G50641.1
